# Supplementary material
Source: PubMed Central journal article supplement (PMC5222785)
Supplement: NIHMS809978-supplement-Supp_info.pdf [file NIHMS809978-supplement-Supp_info.pdf]

## SUPPLEMENTAL INFORMATION

### Decrease in Somatostatin-Positive Cell Density in the Amygdala of Females with Major Depression

Gaelle Douillard-Guilloux<sup>1</sup>, David Lewis<sup>1,2</sup>, Marianne L. Seney<sup>1,§</sup>, Etienne Sibille<sup>1,2,3,§</sup>

<sup>1</sup>Department of Psychiatry, University of Pittsburgh Medical School, Pittsburgh, PA, USA

<sup>2</sup>Center for Neuroscience, University of Pittsburgh, Pittsburgh, PA, USA

<sup>3</sup>Campbell Family Mental Health Research Institute of CAMH; Departments of Psychiatry, and of Pharmacology and Toxicology, University of Toronto, Toronto, CA

<sup>§</sup>Corresponding authors:

Marianne L. Seney

450 Technology Drive

Bridgeside Point II Room 226

Pittsburgh, PA 15219

Phone: 412-624-3072; Fax: 412-624-5280

seneyml@upmc.edu

Etienne Sibille

250 College Street

Toronto, ON M5T 1R8

Phone: 416-535-8501, ext 36571

Etienne.sibille@camh.ca

**Supplementary Table 1. Statistical p-values associated with the effect of potential cofactors on cluster density<sup>1</sup>.**

|                            | All  |      |      |           |      |      |      | Small Clusters |      |      |      |           |      |      | Large Clusters |      |      |      |      |           |      |      |      |      |
|----------------------------|------|------|------|-----------|------|------|------|----------------|------|------|------|-----------|------|------|----------------|------|------|------|------|-----------|------|------|------|------|
|                            | Age  | PMI  | pH   | RNA ratio | RIN  | S    | AD   | Alc            | Age  | PMI  | pH   | RNA ratio | RIN  | S    | AD             | Alc  | Age  | PMI  | pH   | RNA ratio | RIN  | S    | AD   | Alc  |
| <b>Lateral nucleus</b>     |      |      |      |           |      |      |      |                |      |      |      |           |      |      |                |      |      |      |      |           |      |      |      |      |
| Lateral traverse           | 0.89 | 0.84 | 0.03 | 0.97      | 0.81 | 0.74 | 0.97 | 0.16           | 0.98 | 0.40 | 0.02 | 0.72      | 0.79 | 0.29 | 0.08           | 0.16 | 0.57 | 0.84 | 0.06 | 0.38      | 0.99 | 0.93 | 0.99 | 0.01 |
| Medial traverse            | 0.90 | 0.60 | 0.55 | 0.70      | 0.44 | 0.32 | 0.48 | 0.72           | 0.83 | 0.40 | 0.16 | 0.36      | 0.42 | 0.10 | 0.95           | 0.82 | 0.96 | 0.29 | 0.74 | 0.71      | 0.75 | 0.41 | 0.71 | 0.26 |
| Central traverse           | 0.37 | 0.35 | 0.06 | 0.80      | 0.46 | 0.69 | 0.61 | 0.80           | 0.67 | 0.15 | 0.09 | 0.30      | 0.51 | 0.82 | 0.41           | 0.63 | 0.99 | 0.08 | 0.01 | 0.51      | 0.60 | 0.58 | 0.83 | 0.58 |
| <b>Mean</b>                | 0.22 | 0.31 | 0.04 | 0.84      | 0.33 | 0.58 | 0.48 | 0.97           | 0.86 | 0.16 | 0.07 | 0.36      | 0.54 | 0.35 | 0.38           | 0.75 | 0.49 | 0.10 | 0.02 | 0.76      | 0.80 | 0.30 | 0.73 | 0.05 |
| <b>Basolateral nucleus</b> |      |      |      |           |      |      |      |                |      |      |      |           |      |      |                |      |      |      |      |           |      |      |      |      |
| Lateral traverse           | 0.58 | 0.95 | <.01 | 0.24      | 0.26 | 0.16 | 0.57 | 0.66           | 0.60 | 0.60 | 0.01 | 0.66      | 0.51 | 0.46 | 0.31           | 0.63 | 0.29 | 0.26 | 0.07 | 0.11      | 0.46 | 0.40 | 0.96 | 0.97 |
| Medial traverse            | 0.61 | 0.55 | <.01 | 0.33      | 0.67 | 0.49 | 0.63 | 0.85           | 0.91 | 0.83 | <.01 | 0.77      | 0.68 | 0.89 | 0.86           | 0.74 | 0.68 | 0.75 | <.01 | 0.26      | 0.45 | 0.83 | 0.59 | 0.52 |
| Central traverse           | 0.12 | 0.90 | <.01 | 0.80      | 0.60 | 0.17 | 0.64 | 0.67           | 0.85 | 0.67 | <.01 | 0.90      | 0.98 | 0.32 | 0.08           | 0.44 | 0.23 | 0.54 | 0.05 | 0.52      | 0.75 | 0.91 | 0.23 | 0.95 |
| <b>Mean</b>                | 0.55 | 0.97 | <.01 | 0.45      | 0.66 | 0.22 | 0.43 | 0.61           | 0.87 | 0.86 | <.01 | 0.90      | 0.86 | 0.56 | 0.39           | 0.70 | 0.26 | 0.49 | <.01 | 0.14      | 0.35 | 0.46 | 0.47 | 0.60 |
| <b>Basolateral nucleus</b> |      |      |      |           |      |      |      |                |      |      |      |           |      |      |                |      |      |      |      |           |      |      |      |      |
| <b>Mean</b>                | 0.54 | 0.81 | <.01 | 0.18      | <.01 | 0.87 | 0.13 | 0.30           | 0.67 | 0.80 | 0.03 | 0.31      | 0.35 | 0.31 | 0.89           | 0.94 | 0.89 | 0.99 | 0.05 | 0.02      | 0.37 | 0.46 | 0.77 | 0.68 |

<sup>1</sup>Cluster density per mm<sup>2</sup>. Light grey shades indicate significant effects (p < 0.05); dark grey shades indicates significant effects that survived correction for multiple testing. AD, antidepressants at time of death; Alc, alcohol dependence at time of death PMI, postmortem interval; RIN, RNA integrity number; S, death by suicide.

**Supplementary Table 2. Statistical p-values associated with the effect of potential cofactors on grain counts<sup>1</sup>.**

|                            | All  |      |      |           |      |      |      | Small Clusters |      |      |      |           |      |      | Large Clusters |      |      |      |      |           |      |      |      |      |
|----------------------------|------|------|------|-----------|------|------|------|----------------|------|------|------|-----------|------|------|----------------|------|------|------|------|-----------|------|------|------|------|
|                            | Age  | PMI  | pH   | RNA ratio | RIN  | S    | AD   | Alc            | Age  | PMI  | pH   | RNA ratio | RIN  | S    | AD             | Alc  | Age  | PMI  | pH   | RNA ratio | RIN  | S    | AD   | Alc  |
| <b>Lateral nucleus</b>     |      |      |      |           |      |      |      |                |      |      |      |           |      |      |                |      |      |      |      |           |      |      |      |      |
| Lateral traverse           | 0.64 | 0.67 | 0.53 | 0.84      | 0.69 | 0.15 | 0.84 | 0.57           | 0.70 | 0.58 | 0.64 | 0.79      | 0.87 | 0.03 | 0.89           | 0.90 | 0.05 | 0.09 | 0.48 | 0.82      | 0.56 | 0.25 | 0.03 | 0.94 |
| Medial traverse            | 0.45 | 0.99 | 0.67 | 0.68      | 0.41 | 0.12 | 0.99 | 0.75           | 0.33 | 0.68 | 0.51 | 0.35      | 0.96 | 0.01 | 0.95           | 0.71 | 0.31 | 0.69 | 0.70 | 0.57      | 0.24 | 0.43 | 0.98 | 0.58 |
| Central traverse           | 0.42 | 0.63 | 0.14 | 0.56      | 0.95 | 0.36 | 0.49 | 0.22           | 0.92 | 0.96 | 0.49 | 0.31      | 0.51 | 0.10 | 0.42           | 0.58 | 0.26 | 0.46 | 0.35 | 0.36      | 0.79 | 0.08 | 0.59 | 0.22 |
| <b>Mean</b>                | 0.66 | 0.21 | 0.03 | 0.85      | 0.75 | 0.26 | 0.52 | 0.78           | 0.61 | 0.38 | 0.09 | 0.56      | 0.53 | <.01 | 0.46           | 0.95 | 0.53 | 0.25 | 0.05 | 0.81      | 0.55 | 0.50 | 0.25 | 0.42 |
| <b>Basolateral nucleus</b> |      |      |      |           |      |      |      |                |      |      |      |           |      |      |                |      |      |      |      |           |      |      |      |      |
| Lateral traverse           | 0.57 | 0.59 | 0.88 | 0.99      | 0.73 | 0.85 | 0.70 | 0.29           | 0.41 | 0.74 | 0.37 | 0.85      | 0.74 | 0.61 | 0.76           | 0.85 | 0.58 | 0.72 | 0.07 | 0.51      | 0.76 | 0.42 | 0.96 | 0.58 |
| Medial traverse            | 0.71 | 0.26 | 0.08 | 0.06      | 0.61 | 0.37 | 0.91 | 0.57           | 0.52 | 0.86 | 0.82 | 0.06      | 0.98 | 0.80 | 0.65           | 0.41 | 0.14 | 0.26 | 0.11 | 0.33      | 0.67 | 0.51 | 0.50 | 0.80 |
| Central traverse           | 0.72 | 0.05 | 0.41 | 0.84      | 0.75 | 0.76 | 0.21 | 0.01           | 0.67 | 0.79 | 0.70 | 0.56      | 0.36 | 0.80 | 0.99           | 0.01 | 0.38 | 0.83 | 0.99 | 0.14      | 0.94 | 0.81 | 0.97 | 0.67 |
| <b>Mean</b>                | 0.89 | 0.63 | 0.33 | 0.53      | 0.83 | 0.44 | 0.66 | 0.82           | 0.70 | 0.77 | 0.91 | 0.41      | 0.66 | 0.77 | 0.98           | 0.08 | 0.89 | 0.49 | 0.09 | 0.29      | 0.87 | 0.45 | 0.50 | 0.58 |
| <b>Basolateral nucleus</b> |      |      |      |           |      |      |      |                |      |      |      |           |      |      |                |      |      |      |      |           |      |      |      |      |
| <b>Mean</b>                | 0.20 | 0.04 | 0.11 | .14       | <.01 | 0.62 | 0.15 | 0.36           | 0.85 | 0.02 | 0.09 | 0.40      | <.01 | 0.47 | 0.24           | 0.30 | 0.64 | 0.28 | 0.10 | 0.04      | <.01 | 0.94 | 0.71 | 0.44 |

<sup>1</sup>Ratio of area covered by silver grains for SST-positive cells. Light grey shades indicate significant effects ( $p < 0.05$ ); dark grey shades indicates significant effects that survived correction for multiple testing. AD, antidepressants at time of death; Alc, alcohol dependence at time of death PMI, postmortem interval; RIN, RNA integrity number; S, death by suicide.

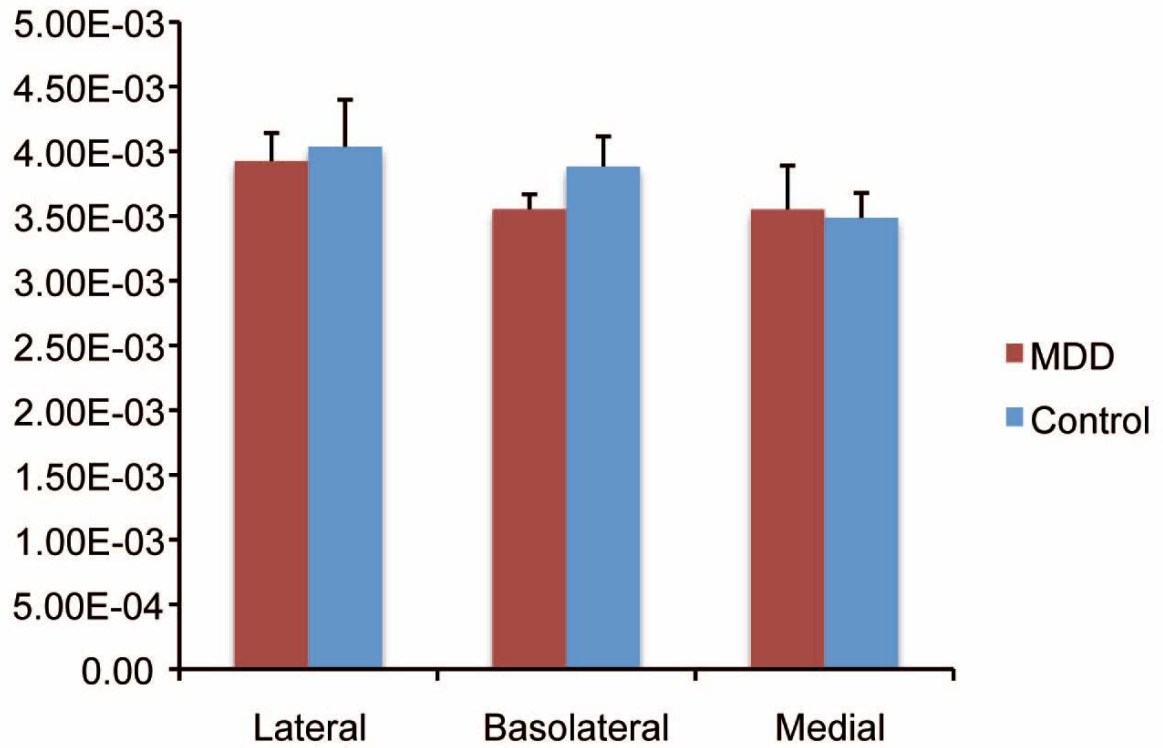

**Supplementary Figure 1.** There were no differences in the density of cresyl violet stained cells in the lateral, basolateral, or basomedial amygdala between controls and MDD subjects. Data are expressed as the number of cells per mm<sup>2</sup>. Error bars represent standard error of the mean.
